# Supplementary material for: Characterization of Naturally Occurring NS5A and NS5B Polymorphisms in Patients Infected with HCV Genotype 3a Treated with Direct-Acting Antiviral Agents
Source: PubMed Central journal article supplement (PMC5580469; doi:10.3390/v9080212), 2017-08-07
Supplement: viruses-09-00212-s001.pdf [file viruses-09-00212-s001.pdf]

**SUPPLEMENTARY MATERIAL**

**Supplementary Table S1:** Prevalence of polymorphisms observed in the NS5A (panel A) and NS5B (panel B) regions from 53 and 233 sequences, respectively, retrieved from the Los Alamos database. The reference D17763 is shown on the top line. The numbers next to the observed amino-acid substitutions represent the percent of observations with a specific substitution.

**A)**

| Reference  | S <sub>96.2</sub> | D <sub>13.2</sub> | D <sub>98.1</sub> | T <sub>83.0</sub> | D <sub>92.5</sub> | C <sub>98.1</sub> | S <sub>94.3</sub> | V <sub>98.1</sub> | L <sub>98.1</sub> | A <sub>7.5</sub>  | F <sub>98.1</sub> | K <sub>94.3</sub> | A <sub>98.1</sub> | I <sub>98.1</sub> | M <sub>98.1</sub> | A <sub>98.1</sub> | I <sub>92.5</sub> |
|------------|-------------------|-------------------|-------------------|-------------------|-------------------|-------------------|-------------------|-------------------|-------------------|-------------------|-------------------|-------------------|-------------------|-------------------|-------------------|-------------------|-------------------|
| aa         | 1                 | 2                 | 3                 | 7                 | 10                | 13                | 14                | 15                | 16                | 17                | 19                | 20                | 21                | 27                | 28                | 30                | 37                |
| Variants % | C <sub>3.8</sub>  | G <sub>86.8</sub> | N <sub>1.9</sub>  | D <sub>17.0</sub> | E <sub>7.5</sub>  | S <sub>1.9</sub>  | I <sub>5.7</sub>  | A <sub>1.9</sub>  | V <sub>1.9</sub>  | S <sub>92.5</sub> | S <sub>1.9</sub>  | R <sub>5.7</sub>  | S <sub>1.9</sub>  | V <sub>1.9</sub>  | I <sub>1.9</sub>  | L <sub>1.9</sub>  | L <sub>7.5</sub>  |
|            |                   |                   |                   | I <sub>9.4</sub>  |                   |                   | M <sub>34.0</sub> | L <sub>3.8</sub>  |                   |                   |                   |                   | T <sub>92.5</sub> |                   |                   | T <sub>3.8</sub>  | V <sub>1.9</sub>  |
|            |                   |                   |                   | P <sub>1.9</sub>  |                   |                   | T <sub>37.7</sub> | M <sub>1.9</sub>  |                   |                   |                   |                   |                   |                   |                   | V <sub>1.9</sub>  |                   |
|            |                   |                   |                   | S <sub>1.9</sub>  |                   |                   |                   | T <sub>9.4</sub>  |                   |                   |                   |                   |                   |                   |                   |                   |                   |
| Reference  | K <sub>92.5</sub> | Y <sub>98.1</sub> | V <sub>98.1</sub> | M <sub>98.1</sub> | S <sub>98.1</sub> | P <sub>98.1</sub> | A <sub>94.3</sub> | A <sub>98.1</sub> | I <sub>98.1</sub> | T <sub>69.8</sub> | S <sub>98.1</sub> | L <sub>98.1</sub> | A <sub>96.2</sub> | T <sub>96.2</sub> | W <sub>98.1</sub> | H <sub>96.2</sub> | S <sub>84.9</sub> |
| aa         | 41                | 43                | 46                | 53                | 54                | 58                | 61                | 62                | 63                | 64                | 71                | 74                | 75                | 79                | 84                | 85                | 98                |
| Variants % | R <sub>7.5</sub>  | S <sub>1.9</sub>  | A <sub>1.9</sub>  | T <sub>1.9</sub>  | T <sub>1.9</sub>  | R <sub>1.9</sub>  | S <sub>5.7</sub>  | P <sub>1.9</sub>  | L <sub>1.9</sub>  | A <sub>30.2</sub> | T <sub>1.9</sub>  | I <sub>1.9</sub>  | S <sub>3.8</sub>  | K <sub>3.8</sub>  | C <sub>1.9</sub>  | N <sub>3.8</sub>  | G <sub>15.1</sub> |
|            |                   |                   |                   |                   |                   | S <sub>1.9</sub>  |                   | Q <sub>1.9</sub>  |                   | S <sub>3.8</sub>  |                   |                   |                   | M <sub>5.7</sub>  |                   | Y <sub>32.1</sub> |                   |
|            |                   |                   |                   |                   |                   |                   |                   | S <sub>60.4</sub> |                   |                   |                   |                   |                   | R <sub>1.9</sub>  |                   |                   |                   |
|            |                   |                   |                   |                   |                   |                   |                   | T <sub>32.1</sub> |                   |                   |                   |                   |                   |                   |                   |                   |                   |
| Reference  | T <sub>98.1</sub> | S <sub>92.5</sub> | P <sub>96.2</sub> | Y <sub>98.1</sub> | T <sub>98.1</sub> | W <sub>92.5</sub> | N <sub>96.2</sub> | S <sub>98.1</sub> | Y <sub>98.1</sub> | V <sub>98.1</sub> |                   |                   |                   |                   |                   |                   |                   |
| aa         | 99                | 103               | 104               | 106               | 107               | 111               | 116               | 117               | 118               | 119               |                   |                   |                   |                   |                   |                   |                   |
| Variants % | A <sub>1.9</sub>  | A <sub>7.5</sub>  | H <sub>3.8</sub>  | F <sub>1.9</sub>  | A <sub>1.9</sub>  | L <sub>7.5</sub>  | D <sub>3.8</sub>  | N <sub>1.9</sub>  | C <sub>1.9</sub>  | A <sub>1.9</sub>  |                   |                   |                   |                   |                   |                   |                   |
|            | I <sub>3.8</sub>  | P <sub>45.3</sub> | L <sub>1.9</sub>  |                   |                   |                   | S <sub>11.3</sub> |                   |                   |                   |                   |                   |                   |                   |                   |                   |                   |

**B)**

|                   |                                                           |                                                                                                                      |                                      |                         |                                                                                                   |                         |                                                          |                         |                                      |                                                          |                                                          |                                                                                                                       |                                                          |                                                          |                                      |                                                                                                                       |
|-------------------|-----------------------------------------------------------|----------------------------------------------------------------------------------------------------------------------|--------------------------------------|-------------------------|---------------------------------------------------------------------------------------------------|-------------------------|----------------------------------------------------------|-------------------------|--------------------------------------|----------------------------------------------------------|----------------------------------------------------------|-----------------------------------------------------------------------------------------------------------------------|----------------------------------------------------------|----------------------------------------------------------|--------------------------------------|-----------------------------------------------------------------------------------------------------------------------|
| <b>Reference</b>  | <b>P<sub>97.0</sub></b>                                   | <b>A<sub>99.1</sub></b>                                                                                              | <b>Y<sub>99.6</sub></b>              | <b>D<sub>99.6</sub></b> | <b>V<sub>98.7</sub></b>                                                                           | <b>R<sub>99.6</sub></b> | <b>A<sub>98.7</sub></b>                                  | <b>Y<sub>99.1</sub></b> | <b>D<sub>99.1</sub></b>              | <b>V<sub>98.7</sub></b>                                  | <b>I<sub>98.3</sub></b>                                  | <b>Q<sub>99.1</sub></b>                                                                                               | <b>K<sub>96.1</sub></b>                                  | <b>L<sub>99.1</sub></b>                                  | <b>S<sub>98.3</sub></b>              | <b>I<sub>89.3</sub></b>                                                                                               |
| <b>aa</b>         | 156                                                       | 157                                                                                                                  | 162                                  | 164                     | 169                                                                                               | 173                     | 174                                                      | 176                     | 177                                  | 178                                                      | 179                                                      | 180                                                                                                                   | 181                                                      | 182                                                      | 183                                  | 184                                                                                                                   |
| <b>Variants %</b> | A <sub>3.4</sub><br>R <sub>0.4</sub><br>S <sub>0.4</sub>  | P <sub>0.4</sub><br>S <sub>0.4</sub>                                                                                 | F <sub>0.4</sub>                     | G <sub>0.4</sub>        | I <sub>1.3</sub>                                                                                  | M <sub>0.4</sub>        | V <sub>1.3</sub>                                         | D <sub>0.8</sub>        | K <sub>0.8</sub>                     | A <sub>0.8</sub><br>I <sub>0.4</sub>                     | A <sub>0.4</sub><br>L <sub>0.4</sub><br>R <sub>0.8</sub> | E <sub>0.8</sub>                                                                                                      | Q <sub>2.1</sub><br>R <sub>1.7</sub>                     | M <sub>0.8</sub>                                         | A <sub>0.8</sub><br>P <sub>0.8</sub> | K <sub>0.4</sub><br>S <sub>0.4</sub><br>T <sub>0.8</sub><br>V <sub>1.7</sub>                                          |
| <b>Reference</b>  | <b>E<sub>69.5</sub></b>                                   | <b>T<sub>96.1</sub></b>                                                                                              | <b>M<sub>98.7</sub></b>              | <b>G<sub>99.6</sub></b> | <b>P<sub>35.6</sub></b>                                                                           | <b>A<sub>99.1</sub></b> | <b>Q<sub>98.7</sub></b>                                  | <b>Q<sub>99.6</sub></b> | <b>E<sub>96.6</sub></b>              | <b>R<sub>96.1</sub></b>                                  | <b>L<sub>99.6</sub></b>                                  | <b>K<sub>76.4</sub></b>                                                                                               | <b>M<sub>98.7</sub></b>                                  | <b>T<sub>98.3</sub></b>                                  | <b>S<sub>97.9</sub></b>              | <b>K<sub>99.6</sub></b>                                                                                               |
| <b>aa</b>         | 185                                                       | 186                                                                                                                  | 187                                  | 188                     | 189                                                                                               | 190                     | 198                                                      | 199                     | 202                                  | 203                                                      | 204                                                      | 206                                                                                                                   | 207                                                      | 209                                                      | 210                                  | 211                                                                                                                   |
| <b>Variants %</b> | A <sub>28.3</sub><br>G <sub>1.3</sub><br>T <sub>0.4</sub> | A <sub>2.1</sub><br>I <sub>0.4</sub><br>S <sub>0.4</sub><br>V <sub>0.8</sub>                                         | I <sub>0.4</sub><br>L <sub>0.8</sub> | V <sub>0.4</sub>        | A <sub>2.1</sub><br>D <sub>0.8</sub><br>L <sub>1.3</sub><br>S <sub>61.6</sub><br>T <sub>0.8</sub> | S <sub>0.8</sub>        | A <sub>0.4</sub><br>K <sub>0.4</sub><br>R <sub>0.4</sub> | E <sub>0.4</sub>        | D <sub>3.4</sub>                     | F <sub>0.4</sub><br>H <sub>2.5</sub><br>Y <sub>0.8</sub> | M <sub>0.4</sub>                                         | D <sub>0.4</sub><br>E <sub>15.5</sub><br>N <sub>1.3</sub><br>Q <sub>6.9</sub><br>R <sub>0.4</sub><br>T <sub>3.0</sub> | A <sub>0.4</sub><br>I <sub>0.8</sub>                     | A <sub>0.4</sub><br>G <sub>0.4</sub><br>S <sub>0.8</sub> | A <sub>2.1</sub>                     | R <sub>0.4</sub>                                                                                                      |
| <b>Reference</b>  | <b>K<sub>96.6</sub></b>                                   | <b>T<sub>94.4</sub></b>                                                                                              | <b>L<sub>97.9</sub></b>              | <b>S<sub>99.6</sub></b> | <b>D<sub>99.6</sub></b>                                                                           | <b>D<sub>99.6</sub></b> | <b>V<sub>99.1</sub></b>                                  | <b>E<sub>99.6</sub></b> | <b>Q<sub>99.1</sub></b>              | <b>I<sub>97.4</sub></b>                                  | <b>V<sub>93.1</sub></b>                                  | <b>E<sub>99.1</sub></b>                                                                                               | <b>E<sub>97.4</sub></b>                                  | <b>I<sub>97.4</sub></b>                                  | <b>C<sub>99.6</sub></b>              | <b>N<sub>86.3</sub></b>                                                                                               |
| <b>aa</b>         | 212                                                       | 213                                                                                                                  | 215                                  | 218                     | 220                                                                                               | 225                     | 228                                                      | 230                     | 231                                  | 233                                                      | 235                                                      | 237                                                                                                                   | 238                                                      | 239                                                      | 242                                  | 244                                                                                                                   |
| <b>Variants %</b> | E <sub>0.4</sub><br>R <sub>3.0</sub>                      | A <sub>1.3</sub><br>D <sub>0.4</sub><br>I <sub>0.8</sub><br>N <sub>1.3</sub><br>S <sub>1.3</sub><br>V <sub>0.4</sub> | M <sub>2.1</sub>                     | L <sub>0.4</sub>        | G <sub>0.4</sub>                                                                                  | Y <sub>0.4</sub>        | I <sub>0.8</sub>                                         | G <sub>0.4</sub>        | H <sub>0.4</sub><br>R <sub>0.4</sub> | F <sub>0.8</sub><br>T <sub>0.4</sub><br>V <sub>1.3</sub> | A <sub>2.1</sub><br>M <sub>1.7</sub><br>T <sub>3.0</sub> | G <sub>0.8</sub>                                                                                                      | A <sub>0.4</sub><br>D <sub>1.7</sub><br>S <sub>0.4</sub> | M <sub>0.4</sub><br>V <sub>2.1</sub>                     | A <sub>0.4</sub>                     | A <sub>0.8</sub><br>D <sub>12.0</sub><br>H <sub>0.4</sub><br>K <sub>0.4</sub><br>S <sub>0.8</sub><br>T <sub>0.4</sub> |
| <b>Reference</b>  | <b>L<sub>99.6</sub></b>                                   | <b>E<sub>99.1</sub></b>                                                                                              | <b>P<sub>99.6</sub></b>              | <b>A<sub>99.1</sub></b> | <b>R<sub>86.3</sub></b>                                                                           | <b>K<sub>97.9</sub></b> | <b>V<sub>99.1</sub></b>                                  | <b>I<sub>99.6</sub></b> | <b>S<sub>95.7</sub></b>              | <b>S<sub>99.6</sub></b>                                  | <b>E<sub>99.6</sub></b>                                  | <b>C<sub>99.1</sub></b>                                                                                               | <b>M<sub>99.1</sub></b>                                  | <b>F<sub>97.4</sub></b>                                  | <b>S<sub>98.7</sub></b>              | <b>K<sub>99.1</sub></b>                                                                                               |
| <b>aa</b>         | 245                                                       | 246                                                                                                                  | 247                                  | 249                     | 250                                                                                               | 251                     | 252                                                      | 253                     | 254                                  | 255                                                      | 258                                                      | 262                                                                                                                   | 266                                                      | 267                                                      | 269                                  | 270                                                                                                                   |
| <b>Variants %</b> | P <sub>0.4</sub>                                          | D <sub>0.4</sub>                                                                                                     | Q <sub>0.4</sub>                     | P <sub>0.4</sub>        | G <sub>0.4</sub>                                                                                  | Q <sub>0.4</sub>        | A <sub>0.8</sub>                                         | V <sub>0.4</sub>        | C <sub>0.4</sub>                     | A <sub>0.4</sub>                                         | D <sub>0.4</sub>                                         | I <sub>0.4</sub>                                                                                                      | R <sub>0.8</sub>                                         | H <sub>0.8</sub>                                         | G <sub>0.4</sub>                     | R <sub>0.8</sub>                                                                                                      |

|                   | P <sub>0.4</sub>                                                                                                     | V <sub>0.4</sub>                                                             | K <sub>13.3</sub>        | R <sub>1.3</sub><br>T <sub>0.4</sub> | H <sub>0.4</sub><br>T <sub>3.4</sub> | V <sub>0.4</sub>                                         | N <sub>0.4</sub><br>T <sub>0.4</sub><br>Y <sub>0.8</sub> | N <sub>0.8</sub>                     | T <sub>0.4</sub>                                         |                                                          |                         |                                                          |                                      |                         |                                      |                                                          |
|-------------------|----------------------------------------------------------------------------------------------------------------------|------------------------------------------------------------------------------|--------------------------|--------------------------------------|--------------------------------------|----------------------------------------------------------|----------------------------------------------------------|--------------------------------------|----------------------------------------------------------|----------------------------------------------------------|-------------------------|----------------------------------------------------------|--------------------------------------|-------------------------|--------------------------------------|----------------------------------------------------------|
| <b>Reference</b>  | <b>A<sub>91.8</sub></b>                                                                                              | <b>Q<sub>93.6</sub></b>                                                      | <b>C<sub>100.0</sub></b> | <b>Y<sub>99.6</sub></b>              | <b>R<sub>99.6</sub></b>              | <b>S<sub>98.7</sub></b>                                  | <b>V<sub>99.6</sub></b>                                  | <b>L<sub>99.1</sub></b>              | <b>P<sub>99.6</sub></b>                                  | <b>S<sub>98.7</sub></b>                                  | <b>F<sub>99.6</sub></b> | <b>I<sub>97.0</sub></b>                                  | <b>Y<sub>99.1</sub></b>              | <b>I<sub>99.6</sub></b> | <b>T<sub>96.1</sub></b>              | <b>A<sub>97.4</sub></b>                                  |
| <b>aa</b>         | 272                                                                                                                  | 273                                                                          | 274                      | 276                                  | 277                                  | 282                                                      | 284                                                      | 285                                  | 286                                                      | 288                                                      | 289                     | 293                                                      | 296                                  | 297                     | 300                                  | 303                                                      |
| <b>Variants %</b> | D <sub>3.4</sub><br>I <sub>0.8</sub><br>L <sub>1.3</sub><br>Q <sub>0.4</sub><br>T <sub>1.3</sub><br>V <sub>0.8</sub> | H <sub>1.3</sub><br>P <sub>3.4</sub><br>R <sub>0.4</sub><br>S <sub>1.3</sub> | R <sub>0.4</sub>         | D <sub>0.4</sub>                     | L <sub>0.4</sub>                     | N <sub>0.4</sub><br>R <sub>0.8</sub>                     | I <sub>0.4</sub>                                         | F <sub>0.8</sub>                     | T <sub>0.4</sub>                                         | H <sub>0.4</sub><br>N <sub>0.4</sub><br>R <sub>0.4</sub> | M <sub>0.4</sub>        | L <sub>0.8</sub><br>M <sub>1.3</sub><br>V <sub>0.8</sub> | F <sub>0.4</sub><br>H <sub>0.4</sub> | T <sub>0.4</sub>        | L <sub>0.4</sub><br>S <sub>3.4</sub> | C <sub>0.4</sub><br>S <sub>0.4</sub><br>V <sub>1.7</sub> |
| <b>Reference</b>  | <b>K<sub>39.9</sub></b>                                                                                              | <b>A<sub>94.8</sub></b>                                                      | <b>A<sub>98.7</sub></b>  | <b>N<sub>0.0</sub></b>               | <b>L<sub>66.9</sub></b>              | <b>R<sub>95.3</sub></b>                                  | <b>N<sub>93.6</sub></b>                                  | <b>P<sub>98.7</sub></b>              | <b>D<sub>98.3</sub></b>                                  | <b>F<sub>99.6</sub></b>                                  | <b>V<sub>99.6</sub></b> | <b>L<sub>99.6</sub></b>                                  | <b>V<sub>99.6</sub></b>              |                         |                                      |                                                          |
| <b>aa</b>         | 304                                                                                                                  | 305                                                                          | 306                      | 307                                  | 308                                  | 309                                                      | 310                                                      | 311                                  | 312                                                      | 313                                                      | 315                     | 320                                                      | 322                                  |                         |                                      |                                                          |
| <b>Variants %</b> | N <sub>1.3</sub><br>R <sub>60.1</sub>                                                                                | G <sub>0.4</sub><br>S <sub>0.4</sub><br>V <sub>4.2</sub>                     | S <sub>1.3</sub>         | G <sub>100.0</sub>                   | I <sub>0.4</sub>                     | K <sub>0.8</sub><br>Q <sub>3.4</sub><br>V <sub>0.4</sub> | D <sub>3.0</sub><br>H <sub>0.8</sub><br>S <sub>2.5</sub> | F <sub>0.8</sub><br>S <sub>0.4</sub> | E <sub>0.8</sub><br>S <sub>0.4</sub><br>V <sub>0.4</sub> | M <sub>0.4</sub>                                         | I <sub>0.4</sub>        | Q <sub>0.4</sub>                                         | L <sub>0.4</sub>                     |                         |                                      |                                                          |

**Supplementary Table S2:** Type and frequency of amino-acid substitutions detected by UDPS in NS5A (panel A) and NS5B (panel B) at baseline and treatment failure for three patients. Substitutions that differed from the reference D17763 (top sequence), are shown while the frequency of the substitution in the viral population and the number of reads harboring the substitution/total number of reads is shown in parenthesis. Only substitutions showing enrichment at treatment failure are included and frequencies lower than the threshold of 1% are reported.

A)  
Pt42

| aa ref | Position | T0                |                   | T1                |                   | T2                  |  |
|--------|----------|-------------------|-------------------|-------------------|-------------------|---------------------|--|
| D      | 2        | G 99.6% (917/921) |                   | G 99.0% (900/909) |                   | G 99.0% (1534/1550) |  |
| D      | 3        |                   |                   | G 2.1% (19/909)   |                   |                     |  |
| T      | 7        | D 98.6% (908/921) |                   | D 98.7% (897/909) |                   | D 97.9% (1518/1550) |  |
| I      | 8        |                   |                   | V 1.4% (13/909)   |                   |                     |  |
| W      | 11       |                   |                   | S 5.1% (46/909)   |                   |                     |  |
| A      | 17       | F 5.1% (47/921)   | S 94.6% (871/921) | S 99.2% (902/909) |                   | S 98.8% (1532/1550) |  |
| K      | 26       | R 2.9% (27/921)   |                   |                   |                   |                     |  |
| A      | 30       | K 92.0% (847/921) | R 7.8% (72/921)   | R 1.3% (12/909)   | T 97.2% (884/909) | T 98.4% (1526/1550) |  |
| L      | 31       |                   |                   | F 99.2% (902/909) |                   | F 98.5% (1527/1550) |  |
| L      | 34       |                   |                   | I 98.8% (898/909) |                   | I 99.1% (1536/1550) |  |
| G      | 42       |                   |                   |                   |                   | V 4.6% (71/1550)    |  |
| V      | 46       | L 1.3% (12/921)   |                   |                   |                   |                     |  |
| W      | 47       | C 1.8% (17/921)   |                   | C 3.5% (32/909)   |                   | C 2.8% (43/1550)    |  |
| R      | 48       | P 4.7% (43/921)   |                   | P 5.7% (52/909)   |                   |                     |  |
| D      | 50       | Y 54.7% (504/921) |                   | Y 35.6% (324/909) |                   | Y 25.9% (401/1550)  |  |
| V      | 52       |                   |                   | M 64.4% (585/909) |                   | M 98.7% (1530/1550) |  |
| G      | 60       | R 1.2% (11/921)   |                   |                   |                   |                     |  |
| A      | 61       |                   |                   | V 1.1% (10/909)   |                   |                     |  |
| A      | 62       | S 99.4% (915/921) |                   | S 98.4% (894/909) |                   | S 99.3% (1539/1550) |  |
| K      | 68       |                   |                   |                   |                   | E 1.0% (16/1550)    |  |
| N      | 69       |                   |                   | D 1.5% (14/909)   |                   |                     |  |
| M      | 72       | V 1.1% (10/921)   |                   | I 1.1% (10/909)   |                   |                     |  |

|   |     |                 |  |                    |                   |  |
|---|-----|-----------------|--|--------------------|-------------------|--|
| R | 78  | C 1.3% (12/921) |  | C 1.1% (10/909)    |                   |  |
| H | 85  | L 1.2% (11/921) |  |                    |                   |  |
| T | 87  |                 |  | P 73.9% (672/909)  |                   |  |
| P | 89  |                 |  |                    | S 1.6% (24/1550)  |  |
| I | 90  |                 |  | V 2.8% (25/909)    |                   |  |
| Y | 93  | F 1.1% (10/921) |  |                    |                   |  |
| S | 98  | G 4.0% (8/199)  |  | G 100.0% (182/182) | G 99.8% (607/608) |  |
| P | 100 | H 1.0% (2/199)  |  |                    |                   |  |
| P | 104 | S 6.0% (12/199) |  |                    |                   |  |

**pt43**

| aa ref | Position | T0                  |                  | T1                  |  | T2                  |                  |
|--------|----------|---------------------|------------------|---------------------|--|---------------------|------------------|
| D      | 3        | N 99.4% (2294/2309) |                  | N 97.2% (2906/2991) |  | N 98.8% (5370/5436) |                  |
| R      | 6        | H 99.5% (2297/2309) |                  | H 96.0% (2873/2991) |  | H 97.7% (5313/5436) |                  |
| T      | 7        | V 57.6% (1330/2309) |                  | V 98.3% (2939/2991) |  | V 99.0% (5384/5436) |                  |
| D      | 10       |                     |                  |                     |  | R 2.4% (55/2309)    |                  |
| W      | 11       | S 7.1% (163/2309)   |                  | S 16.6% (495/2991)  |  |                     |                  |
| S      | 14       | P 3.5% (81/2309)    | R 2.4% (55/2309) |                     |  |                     |                  |
| A      | 17       | S 99.5% (2297/2309) |                  | S 99.5% (2976/2991) |  | S 99.0% (5379/5436) |                  |
| A      | 21       | T 98.4% (2272/2309) |                  | T 99.2% (2968/2991) |  | T 99.1% (5389/5436) |                  |
| I      | 27       |                     |                  |                     |  | V 98.8% (5370/5436) |                  |
| W      | 47       | C 9.2% (213/2309)   |                  | C 3.5% (106/2991)   |  | C 14.2% (774/5436)  |                  |
| T      | 55       |                     |                  | A 1.2% (37/2991)    |  | A 1.0% (55/5436)    |                  |
| P      | 58       | S 99.1% (2289/2309) |                  | S 99.2% (2966/2991) |  | S 99.4% (5401/5436) | M 1.3% (29/2309) |
| A      | 62       | S 99.6% (2300/2309) |                  | S 99.7% (2983/2991) |  | S 99.7% (5421/5436) |                  |

|   |     |                      |                  |                     |  |                     |
|---|-----|----------------------|------------------|---------------------|--|---------------------|
| V | 67  | I 19.1% (442/2309)   | M 1.3% (29/2309) |                     |  |                     |
| A | 75  | V 56.7% (1310/2309)  |                  | V 99.6% (2978/2991) |  | V 99.6% (5417/5436) |
| Y | 93  | C 1.8% (42/2309)     |                  | H 99.2% (2968/2991) |  | H 99.5% (5408/5436) |
| S | 98  | G 100.0% (1019/1019) |                  | G 99.9% (1348/1349) |  | G 99.9% (2286/2289) |
| S | 103 | P 99.6% (1015/1019)  |                  | P 99.8% (1347/1349) |  | P 99.8% (2284/2289) |
| T | 107 | A 5.0% (51/1019)     |                  |                     |  |                     |

**B)  
Pt42**

| aa ref | Position | T0                  | T1 | T2                  |
|--------|----------|---------------------|----|---------------------|
| K      | 181      | E 1.2% (25/2096)    |    |                     |
| G      | 188      | A 45.1% (946/2096)  |    |                     |
| P      | 189      | S 99.2% (2079/2096) |    | S 99.3% (1732/1745) |
| K      | 206      | Q 2.4% (50/2096)    |    |                     |
| K      | 211      |                     |    | R 1.8% (31/1745)    |
| K      | 212      | R 45.0% (944/2096)  |    |                     |
| T      | 213      | N 1.5% (31/2096)    |    |                     |
| N      | 244      | D 17.4% (364/2096)  |    |                     |
| G      | 264      | V 1.0% (22/2096)    |    | V 22.6% (394/1745)  |
| A      | 272      |                     |    | V 1.5% (26/1745)    |
| K      | 304      | R 51.1% (540/1057)  |    |                     |
| A      | 306      | V 0.5% (5/1057)     |    | V 95.3% (888/932)   |
| N      | 307      | G 99.8% (1055/1057) |    | G 99.6% (928/932)   |

**pt43**

| aa ref | Position | T0                  | T1             | T2                  |
|--------|----------|---------------------|----------------|---------------------|
| I      | 160      |                     | V 0.4% (4/942) | V 94.0% (1120/1192) |
| P      | 189      | S 99.5% (2038/2048) | S 99.4%        | S 99.7% (2690/2699) |

|   |     |                     |                  |                        |                  |                     |                  |
|---|-----|---------------------|------------------|------------------------|------------------|---------------------|------------------|
|   |     |                     |                  | (1964/1976)            |                  |                     |                  |
| E | 202 |                     |                  | D 2.6% (51/1976)       |                  |                     |                  |
| M | 207 | V 2.2% (46/2048)    |                  |                        |                  |                     |                  |
| T | 209 |                     |                  |                        |                  | A 2.5% (67/2699)    |                  |
| K | 211 | R 2.6% (53/2048)    |                  | R 2.2% (43/1976)       | S 1.2% (23/1976) |                     |                  |
| T | 213 | N 2.2% (45/2048)    | P 1.8% (36/2048) |                        |                  | P 1.7% (47/2699)    |                  |
| L | 215 | S 6.2% (127/2048)   | V 1.0% (21/2048) | S 1.2% (24/1976)       |                  | S 3.0% (80/2699)    |                  |
| V | 228 |                     |                  | A 1.1% (22/1976)       |                  |                     |                  |
| V | 235 | M 9.9% (202/2048)   |                  |                        |                  |                     |                  |
| E | 237 |                     |                  |                        |                  | G 1.8% (50/2699)    |                  |
| L | 260 | P 1.1% (22/2048)    |                  | R 1.1% (21/1976)       |                  |                     |                  |
| G | 263 |                     |                  | R 1.1% (22/1976)       |                  |                     |                  |
| G | 264 | V 1.4% (28/2048)    |                  | V 1.8% (35/1976)       |                  |                     |                  |
| K | 270 |                     |                  |                        |                  | R 1.2% (33/2699)    |                  |
| A | 272 |                     |                  | V 3.3 (66/1976)        |                  |                     |                  |
| Q | 273 | P 3.0% (62/2048)    |                  | P 99.8%<br>(1971/1976) |                  | P98.9% (2670/2699)  |                  |
| S | 282 |                     |                  | T95.8% (1892/1976)     |                  |                     |                  |
| L | 285 |                     |                  | F 97.2%<br>(1920/1976) |                  | F 99.2% (2677/2699) |                  |
| P | 286 |                     |                  |                        |                  | S 6.6% (177/2699)   |                  |
| S | 288 | N 5.1% (104/2048)   |                  | C 2.1% (42/1976)       |                  | C 1.1% (30/2699)    |                  |
| K | 298 | R 1.5% (30/2048)    |                  |                        |                  |                     |                  |
| K | 304 | R 1.9% (23/1189)    |                  |                        |                  |                     |                  |
| N | 307 | G 99.9% (1188/1189) |                  | G 99.5%<br>(1029/1034) |                  | G 98.2% (1480/1507) | S 1.8% (27/1507) |

pt45

| aa ref | Position | T0               |                      | T1                     |  | T2 |  |
|--------|----------|------------------|----------------------|------------------------|--|----|--|
| I      | 184      | T 0.7% (15/2177) | V 60.27% (1312/2177) | T 97.3%<br>(2001/2056) |  |    |  |
| M      | 187      | T 1.2% (25/2177) |                      |                        |  |    |  |

|   |     |                     |  |                        |  |  |
|---|-----|---------------------|--|------------------------|--|--|
| G | 188 | D 0.7% (16/2177)    |  | D 97.0%<br>(1995/2056) |  |  |
| P | 189 | S 99.6% (2169/2177) |  | S 99.7%<br>(2049/2056) |  |  |
| K | 206 | E 60.2% (1311/2177) |  |                        |  |  |
| K | 211 |                     |  | N 2.3% (47/2056)       |  |  |
| K | 212 | E 2.0% (43/2177)    |  | E 1.4% (28/2056)       |  |  |
| T | 213 | I 22.1% (481/2177)  |  |                        |  |  |
| L | 215 | S 2.7% (59/2177)    |  |                        |  |  |
| F | 217 |                     |  | V 15.8% (325/2056)     |  |  |
| V | 235 | M 31.8% (693/2177)  |  |                        |  |  |
| G | 271 | R 2.7% (59/2177)    |  |                        |  |  |
| A | 272 | G 36.7% (798/2177)  |  | D 39.0% (802/2056)     |  |  |
| Q | 273 | P 73.9% (1609/2177) |  | P 45.8% (942/2056)     |  |  |
| K | 304 | R 22.3% (273/1222)  |  |                        |  |  |
| N | 307 | G 99.9% (1221/1222) |  | G 99.6%<br>(1134/1138) |  |  |
| N | 310 | S 0.6% (8/1222)     |  | S 97.6%<br>(1111/1138) |  |  |

Aa=amino acid; ref=reference; T0=baseline; T1=the first treatment failure visit; T2=the second treatment failure visit.



**Supplementary Table S3.** Baseline characteristics for all HCV GT3a study patients.

| Pt | LT  | Fibrosis state * | HIV status | HCV RNA Log IU/mL | Prior P-R treatment experience | DAA-based Treatment (wks) | Therapy response ** | Polymorphisms at position potentially involved in DAA resistance |       |
|----|-----|------------------|------------|-------------------|--------------------------------|---------------------------|---------------------|------------------------------------------------------------------|-------|
|    |     |                  |            |                   |                                |                           |                     | NS5A                                                             | NS5B  |
| 1  | no  | 4                | neg        | 4.04              | Naive                          | SOF+RBV (24)              | SVR24               | None                                                             | N244D |
| 2  | no  | 4                | neg        | 6.04              | Experienced                    | SOF+DCV+RBV (24)          | SVR12               | A62T                                                             | None  |
| 3  | no  | 4                | neg        | 4.77              | Experienced                    | SOF+pIFN+RBV (12)         | SVR24               | Y93D                                                             | None  |
| 4  | no  | 4                | neg        | 6.35              | Experienced                    | SOF+pIFN+RBV (12)         | SVR24               | None                                                             | None  |
| 5  | no  | 4                | neg        | 5.97              | Naive                          | SOF+pIFN+RBV (24)         | SVR24               | A62T                                                             | None  |
| 6  | no  | 4                | neg        | 4.76              | Naive                          | SOF+pIFN+RBV (12)         | SVR24               | P58T<br>A62T                                                     | None  |
| 7  | no  | 4                | neg        | 6.74              | Naive                          | SOF+pIFN+RBV (12)         | SVR24               | None                                                             | None  |
| 8  | no  | 4                | neg        | 4.16              | Naive                          | SOF+pIFN+RBV (12)         | SVR24               | None                                                             | R309Q |
| 9  | yes | 4                | neg        | 4.76              | Naive                          | SOF+DCV (20)              | SVR24               | None                                                             | None  |
| 10 | yes | 1                | neg        | 6.37              | Naive                          | SOF+pIFN+RBV (24)         | SVR24               | P58A<br>A62T<br>Y93H                                             | None  |
| 11 | no  | 4                | neg        | 6.03              | Experienced                    | SOF+DCV (24)              | SVR12               | None                                                             | n.d.  |
| 12 | yes | 4                | neg        | 4.19              | Naive                          | SOF+DCV (24)              | SVR24               | None                                                             | None  |
| 13 | no  | 4                | neg        | 4.84              | Naive                          | SOF+RBV                   | n.a.                | A62P                                                             | None  |

|    |     |   |     |      |             |                      |       |                      |                |
|----|-----|---|-----|------|-------------|----------------------|-------|----------------------|----------------|
|    |     |   |     |      |             | (40)                 | ***   |                      |                |
| 14 | no  | 4 | neg | 5.34 | Experienced | SOF+RBV<br>(37)      | SVR24 | None                 | None           |
| 15 | no  | 4 | neg | 4.78 | Experienced | SOF+RBV<br>(24)      | SVR24 | A30K                 | None           |
| 16 | no  | 4 | neg | 3.19 | Naive       | SOF+pIFN+RBV<br>(12) | SVR24 | n.d.                 | None           |
| 17 | no  | 4 | neg | 1.08 | Experienced | SOF+DCV<br>(24)      | SVR12 | None                 | None           |
| 18 | no  | 4 | neg | 6.31 | Experienced | SOF+DCV+RBV<br>(24)  | SVR12 | None                 | None           |
| 19 | no  | 4 | neg | 5.10 | Experienced | SOF+DCV+RBV<br>(24)  | SVR12 | A30K                 | None           |
| 20 | no  | 4 | neg | 4.37 | Experienced | SOF+DCV+RBV<br>(24)  | SVR12 | None                 | None           |
| 21 | no  | 4 | neg | 6.63 | Naive       | SOF+DCV+RBV<br>(24)  | SVR24 | None                 | None           |
| 22 | no  | 4 | neg | 4.61 | Naive       | SOF+DCV+RBV<br>(24)  | SVR12 | None                 | None           |
| 23 | no  | 4 | neg | 6.58 | Naive       | SOF+DCV+RBV<br>(24)  | SVR24 | A62T                 | None           |
| 24 | no  | 3 | pos | 6.19 | Experienced | SOF+DCV+RBV<br>(12)  | SVR12 | None                 | None           |
| 25 | no  | 4 | neg | 4.83 | Experienced | SOF+DCV+RBV<br>(24)  | SVR24 | None                 | None           |
| 26 | no  | 4 | neg | 5.30 | Naive       | SOF+DCV+RBV<br>(24)  | SVR24 | None                 | None           |
| 27 | no  | 4 | neg | 5.14 | Experienced | SOF+DCV+RBV<br>(24)  | SVR24 | None                 | N244D          |
| 28 | no  | 4 | neg | 6.84 | Experienced | SOF+DCV+RBV<br>(24)  | SVR24 | A30K<br>Y93N<br>Y93D | None           |
| 29 | no  | 4 | neg | 5.74 | Experienced | SOF+RBV<br>(24)      | SVR24 | None                 | n.d.           |
| 30 | yes | 3 | neg | 5.05 | Naive       | SOF+DCV+RBV<br>(24)  | SVR24 | None                 | None           |
| 31 | no  | 4 | neg | 5.82 | Naive       | SOF+RBV<br>(24)      | SVR24 | None                 | N244D<br>N310D |
| 32 | no  | 4 | neg | 4.76 | Naive       | SOF+DCV+RBV<br>(24)  | SVR24 | None                 | N244D<br>N310D |
| 33 | no  | 2 | pos | 6.04 | Experienced | SOF+RBV<br>(24)      | SVR24 | None                 | None           |
| 34 | yes | 2 | neg | 5.41 | Naive       | SOF+DCV<br>(24)      | SVR12 | None                 | None           |
| 35 | yes | 1 | neg | 4.03 | Naive       | SOF+DCV+RBV          | SVR12 | A62T                 | None           |

|    |      |      |     |      |             |                                              |          |      |       |
|----|------|------|-----|------|-------------|----------------------------------------------|----------|------|-------|
|    |      |      |     |      |             | (24)                                         |          |      |       |
| 36 | no   | 4    | neg | 5.84 | Naive       | SOF+DCV+RBV--<br>> SOF+RBV (8<br>wk)<br>(36) | SVR24    | None | None  |
| 37 | n.k. | n.k. | neg | 5.40 | n.k.        | n.k.                                         | n.k.     | None | N310D |
| 38 | yes  | 2    | neg | 6.68 | Naive       | SOF+RBV<br>(24)                              | SVR24    | None | None  |
| 39 | yes  | 1    | neg | 6.40 | Naive       | SOF+RBV<br>(24)                              | SVR24    | None | n.d.  |
| 40 | no   | 4    | neg | 3.82 | Naive       | SOF+RBV<br>(20)                              | SVR24    | n.d. | None  |
| 41 | no   | 4    | neg | 5.95 | Experienced | SOF+pIFN+RBV<br>(12)                         | SVR24    | n.d. | None  |
| 42 | yes  | 3    | neg | 6.96 | Naive       | SOF+DCV<br>(12)                              | Relapser | A30K | None  |
| 43 | no   | 4    | neg | 4.97 | Naive       | SOF+DCV<br>(24)                              | BT       | P58S | None  |
| 44 | no   | 4    | neg | 5.95 | Experienced | SOF+RBV<br>(24)                              | Relapser | M28L | None  |
| 45 | no   | 4    | pos | 4.58 | Experienced | SOF+RBV<br>(24)                              | Relapser | None | None  |

Pt=patient; LT=liver transplantation; P-R=pegylated interferon (pegIFN)+ribavirin (RBV); BT=breakthrough; n.a.=not available; n.k.=not known; n.d.=not determined; SVR12=sustained virological response at week 12; SVR24=sustained virological response at week 24; DAA= direct antiviral agent; wks=weeks; SOF=sofosbuvir; DCV=daclatasvir; RAS=resistance-associated substitution; BT= breakthrough.

\* Diagnosis of liver cirrhosis was based on clinical or histological features or with non-invasive assessment by transient elastography (stiffness >14 KPa).

\*\*On the basis of last information available at the time of writing the paper.

\*\*\*This patient died just after having undetectable HCV RNA at the end of treatment.
